# Supplementary material for: Efficient Electrocatalyst Nanoparticles from Upcycled Class II Capacitors
Source: MDPI journal article supplement (doi:10.3390/nano12152697), 2022-08-05
Supplement: s1 [file s1]

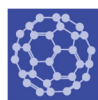

## Supplementary Materials

# Efficient Electrocatalyst Nanoparticles from Upcycled Class II Capacitors

Junhua Xu <sup>1,5</sup>, Daobin Liu <sup>1†</sup>, Carmen Lee <sup>1</sup>, Pierre Feydi <sup>2</sup>, Marlene Chapuis <sup>2</sup>, Jing Yu <sup>1,3</sup>, Emmanuel Billy <sup>2</sup>, Qingyu Yan <sup>1,3</sup> and Jean-Christophe P. Gabriel <sup>1,4,\*</sup>

<sup>1</sup> SCARCE Laboratory, Energy Research Institute @ NTU (ERI@N) | Nanyang Technology University, Singapore 637553, Singapore; junhua.xu@fjirsm.ac.cn (J.X.); ldbin@ustc.edu.cn (D.L.); carmen001@e.ntu.edu.sg (C.L.); yujing@ntu.edu.sg (J.Y.); alexyan@ntu.edu.sg (Q.Y.)

<sup>2</sup> LITEN | Université Grenoble Alpes, CEA, 38054 Grenoble, France; pierre.feydi@laposte.net (P.F.); marlene.chapuis@cea.fr (M.C.); emmanuel.billy@cea.fr (E.B.)

<sup>3</sup> School of Materials Science and Engineering, Nanyang Technological University, Singapore 639798, Singapore

<sup>4</sup> LICSEN | NIMBE | Université Paris-Saclay, CEA | CNRS, 91191 Gif-sur-Yvette, France

<sup>5</sup> Nuclear Chemistry & Separation and Purification Technology Laboratory, Fujian Institute of Research on the Structure of Matter, Chinese Academy of Sciences, Fuzhou, Fujian Province, 350002, China

<sup>†</sup> Current address: Institute for Solid State Physics, The University of Tokyo, Kashiwa, Chiba 277-8581, Japan

\* Correspondence: jean-christophe.gabriel@cea.fr

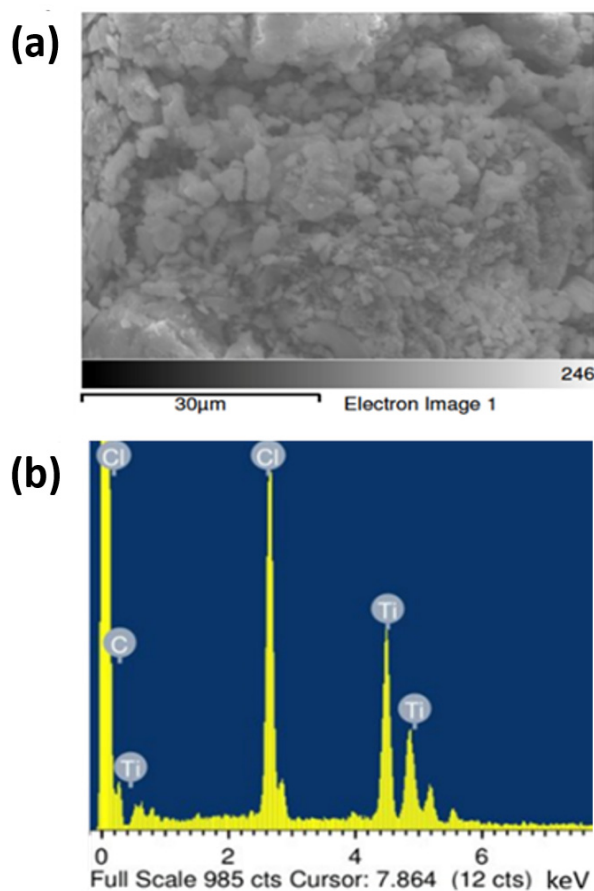

**Figure S1.** (a) The SEM image captured from the residual of leaching MLCC; (b) Energy dispersive X-ray (EDX) elemental analysis of the residual of leaching MLCC.

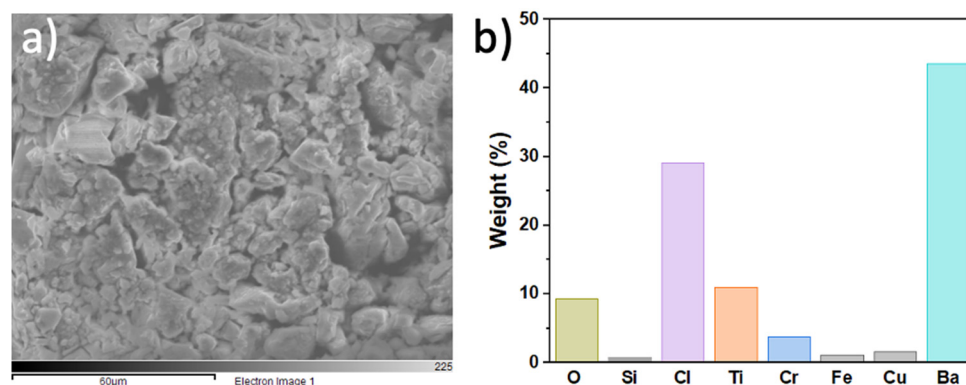

**Figure S2.** (a) SEM and (b) Energy dispersive X-ray (EDX) elemental analysis of the residual after MLCC leaching and extraction using the Aliquat® 336-HCl-H<sub>2</sub>O system.

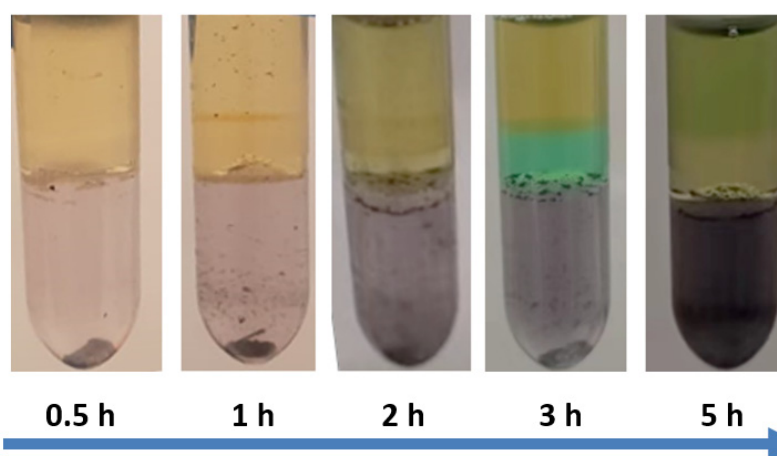

**Figure S3.** Tube appearance evolution as a function of time during the MLCC combined leaching and extraction process (one MLCC placed in 1 mL of 6 M HCl and 1 mL Aliquat® 336 agitated at 1000 rotations per minute (rpm) for 5h at 60°C, using the Eppendorf ThermoMixer C equipment).

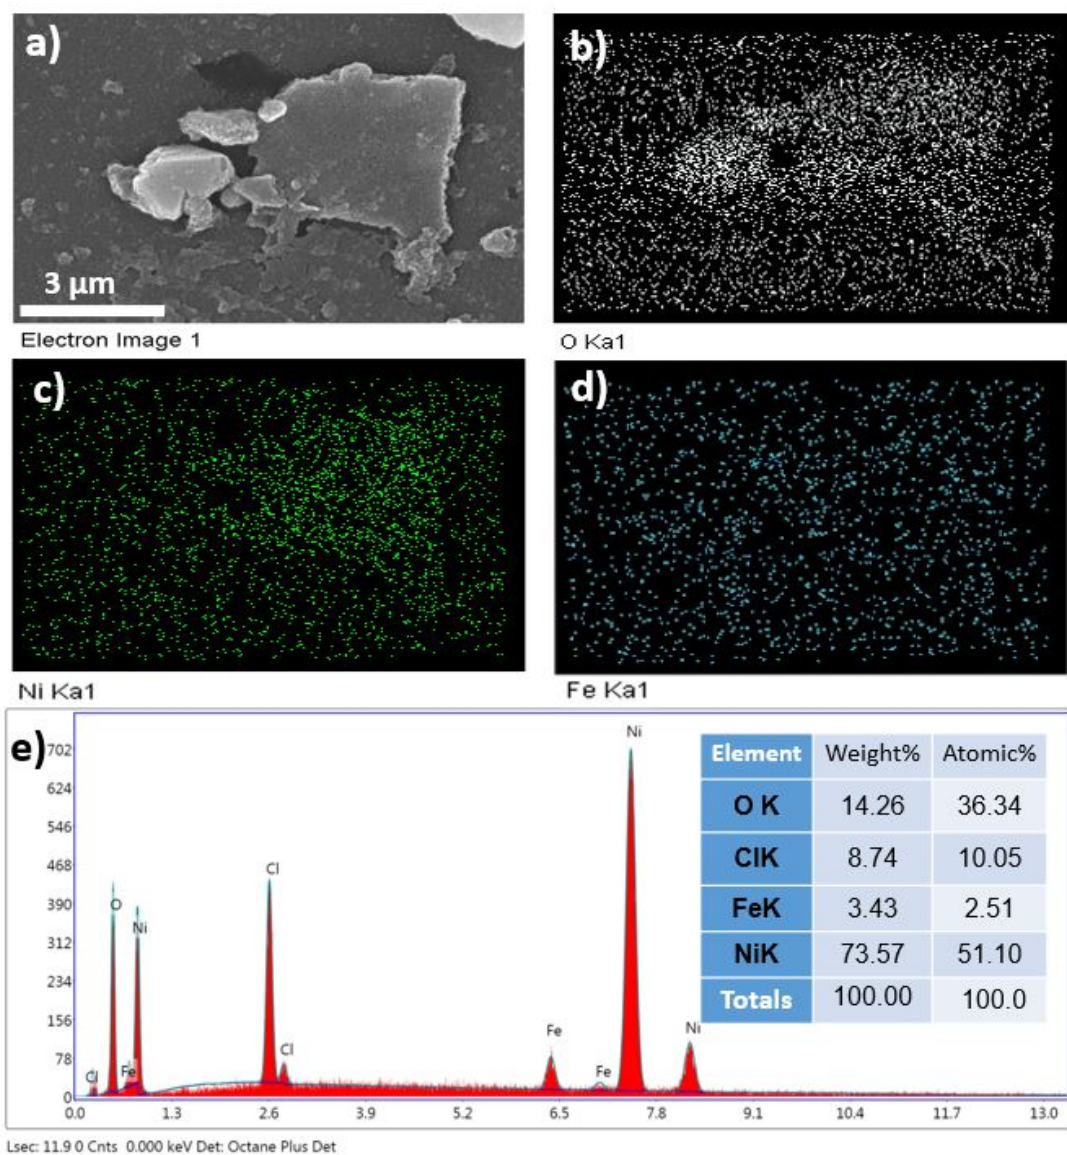

**Figure S4.** (a) SEM image of amorphous NiFe-hydroxide catalyst; (b), (c) and (d) the corresponding SEM-EDX element distribution images for O, Ni, and Fe. (e) The element composition of NiFe-hydroxide catalyst.

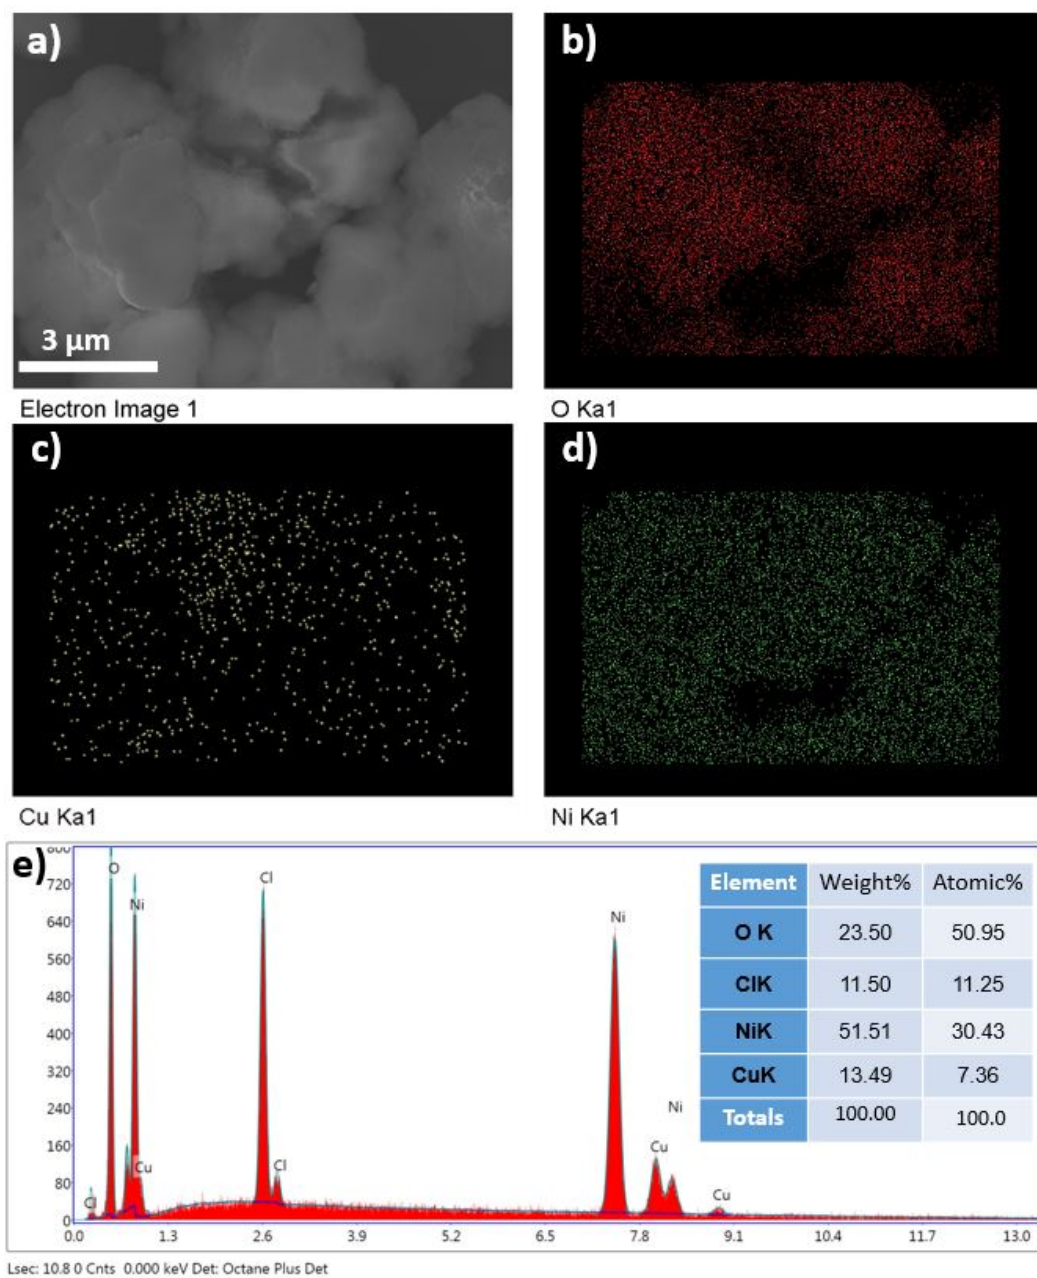

**Figure S5.** (a) SEM image of NiCu-hydroxide catalyst. (b), (c) and (d) the corresponding SEM-EDX element distribution images for O, Cu and Ni. (e) The element composition of NiCu-hydroxide catalyst.

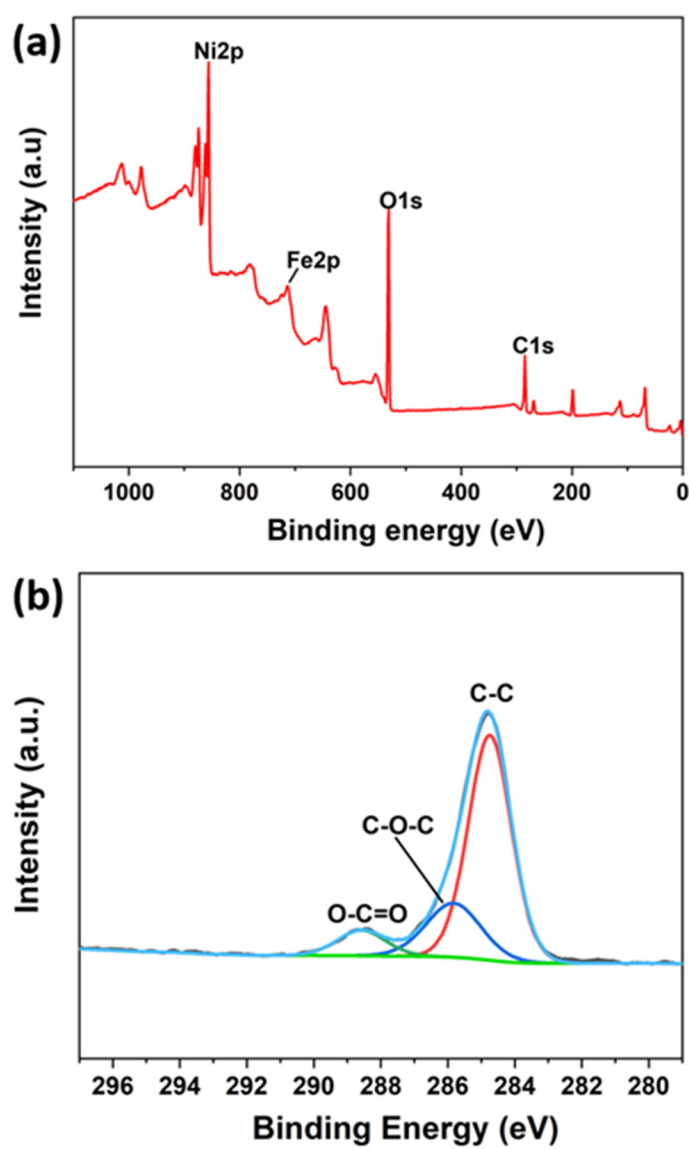

**Figure S6.** XPS spectra for NiFe-hydroxide: (a) full spectra; (b) C 1s peak deconvolution.

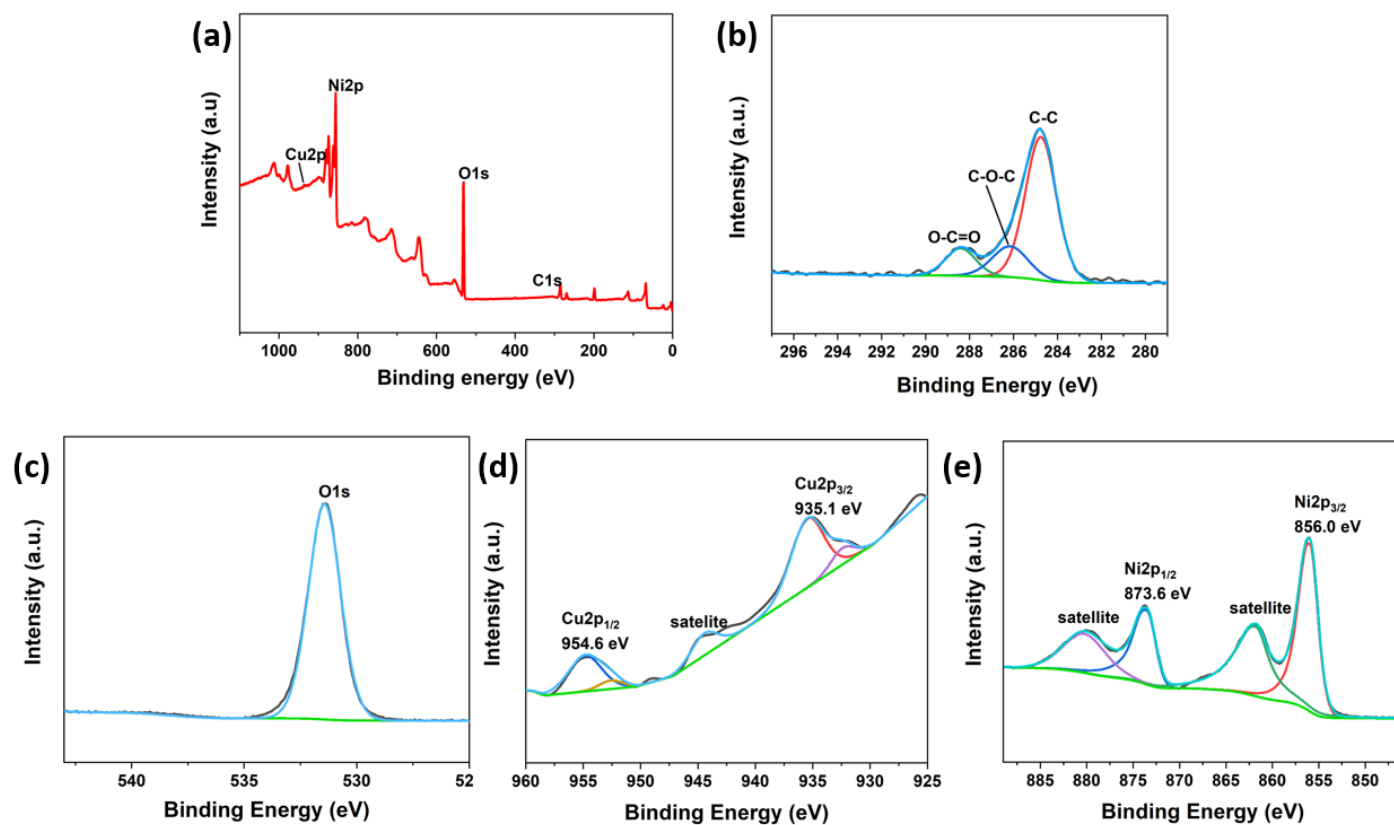

**Figure S7.** XPS spectra of NiCu-hydroxide: (a) full spectra, and various peaks deconvolution (b) C 1s, (c) O 1s, (d) Cu 2p and (e) Ni 2p.

**Table S1.** Metals analysis of scrubbed and regenerated ionic liquid from Zone 3 and zone 4.

|    | Scrub Agent |          |          | Regenerate Agent |           |
|----|-------------|----------|----------|------------------|-----------|
|    | 6 M NaOH    | 6 M NaOH | 6 M NaOH | 0.5 M HCl        | 0.5 M HCl |
| Al | -           | -        | -        | -                | -         |
| Ni | -           | -        | -        | -                | -         |
| Zn | -           | -        | -        | -                | -         |
| Co | -           | -        | -        | -                | -         |
| Mn | -           | -        | -        | -                | -         |
| Cu | 57.3        | 6.4      | -        | -                | -         |
| Fe | -           | -        | -        | -                | -         |
| Pb | -           | -        | -        | -                | -         |
| Ti | -           | -        | -        | -                | -         |
| Sn | 350.1       | 272.2    | 76.8     | -                | -         |

**Table S2.** Metals analysis of Pb selective precipitation from the Ni, Fe and Pb and Ni, Cu, Pb HCl back-extraction solutions from Zone 3 (stream 1) and Zone 4 (stream 2).

| Solution | Metals | Original Solution (mg/L) | Solution After Precipitation (mg/L) | Solution Dissolved the Precipitation Solid by 1 M H <sub>2</sub> SO <sub>4</sub> (mg/L) |
|----------|--------|--------------------------|-------------------------------------|-----------------------------------------------------------------------------------------|
| Stream 1 | Fe     | 31.1                     | -                                   | 153.1                                                                                   |
|          | Ni     | 697.3                    | -                                   | 3408.5                                                                                  |
|          | Pb     | 169.1                    | 37.37                               | -                                                                                       |
| Stream 2 | Cu     | 69.7                     | -                                   | 350.5                                                                                   |
|          | Ni     | 792.2                    | -                                   | 3892.9                                                                                  |
|          | Pb     | 221.1                    | 69.33                               | -                                                                                       |
